# Supplementary material for: Mass Concrete with EAF Steel Slag Aggregate: Workability, Strength, Temperature Rise, and Environmental Performance
Source: MDPI journal article supplement (doi:10.3390/su142315502), 2022-11-22
Supplement: s1 [file s1]

# Mass Concrete with EAF Steel Slag Aggregate: Workability, Strength, Temperature Rise, and Environmental Performance

Davor Kvočka <sup>1</sup>, Jakob Šušteršič <sup>2</sup>, Alenka Mauko Pranjić <sup>1</sup> and Ana Mladenović <sup>1,\*</sup>

<sup>1</sup> Slovenian National Building and Civil Engineering Institute, Dimičeva ulica 12, 1000 Ljubljana, Slovenia

<sup>2</sup> Institute for Research in Materials and Applications, Špruha 18, 1236 Trzin, Slovenia

\* Correspondence: ana.mladenovic@zag.si

## Supplementary data

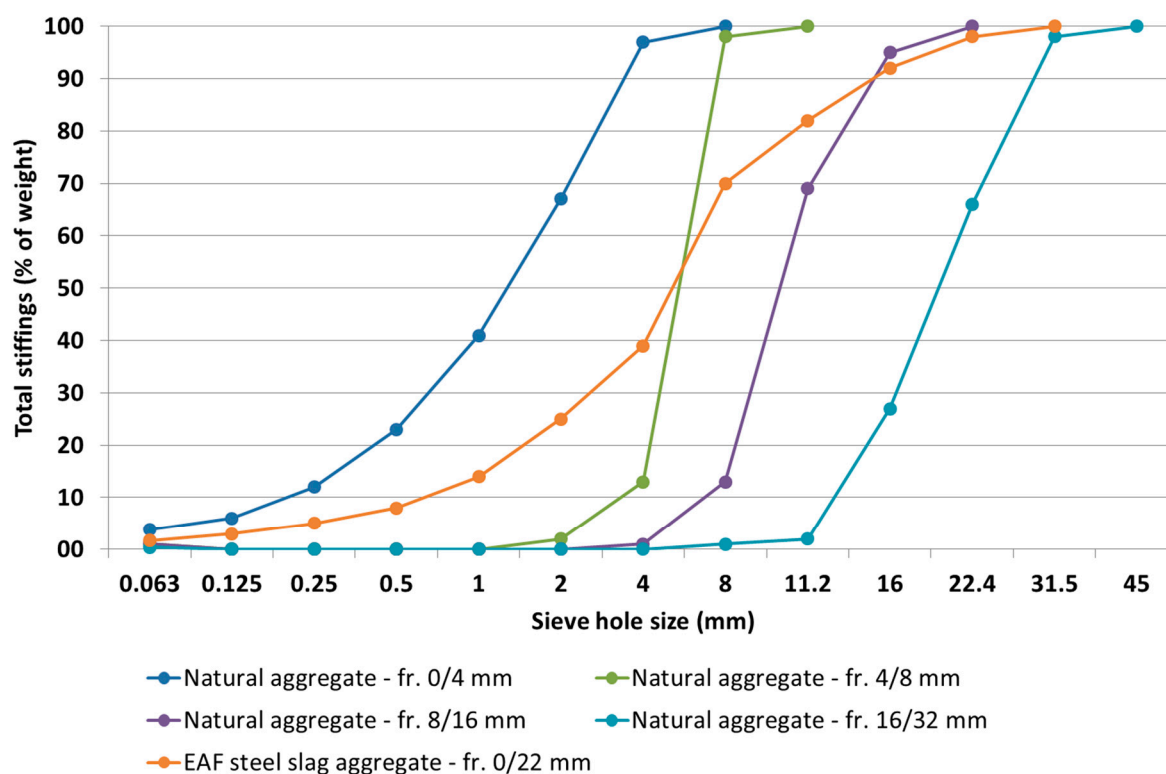

Figure S1. Grain size distribution curves of natural and EAF steel slag aggregates.

**Table S1. The materials and processes included in the LCA study.**

| <b>Inputs</b>                                                                                                        | <b>MB-1</b> | <b>MB-2</b> | <b>MB-3</b> | <b>MB-4</b> | <b>MB-5</b> | <b>MB-6</b> | <b>MB-7</b> | <b>MB-8</b> |
|----------------------------------------------------------------------------------------------------------------------|-------------|-------------|-------------|-------------|-------------|-------------|-------------|-------------|
| <b>Raw materials</b>                                                                                                 |             |             |             |             |             |             |             |             |
| Cement (Type II) (kg)                                                                                                | 320         | /           | 350         | /           | 320         | /           | 350         | /           |
| Cement (Type III) (kg)                                                                                               | /           | 320         | /           | 350         | /           | 320         | /           | 350         |
| Plasticizer (kg)                                                                                                     | 1.92        | 1.92        | 1.75        | 1.75        | 1.60        | 1.60        | 1.75        | 1.75        |
| Natural aggregate (kg)                                                                                               | 1990        | 1984        | 1924        | 1918        | 994         | 991         | 960         | 926         |
| EAF steel slag aggregate (kg)                                                                                        | /           | /           | /           | /           | 1228        | 1223        | 1185        | 1183        |
| <b>Energy and water – concrete production</b>                                                                        |             |             |             |             |             |             |             |             |
| Electricity (kWh)                                                                                                    | 5.6         | 5.6         | 5.6         | 5.6         | 6.2         | 6.2         | 6.2         | 6.2         |
| Water (kg)                                                                                                           | 164         | 164         | 178         | 178         | 216         | 216         | 227         | 227         |
| <b>EAF steel slag processing</b>                                                                                     |             |             |             |             |             |             |             |             |
| Electricity (kWh)                                                                                                    | /           | /           | /           | /           | 3.56        | 3.55        | 3.44        | 3.43        |
| Diesel fuel (kg)                                                                                                     | /           | /           | /           | /           | 0.21        | 0.21        | 0.20        | 0.20        |
| Water (kg)                                                                                                           | /           | /           | /           | /           | 27          | 27          | 26          | 26          |
| <b>Metal recovery</b>                                                                                                |             |             |             |             |             |             |             |             |
| Electricity (kWh)                                                                                                    | /           | /           | /           | /           | 34.38       | 34.24       | 33.18       | 33.12       |
| Diesel (kg)                                                                                                          | /           | /           | /           | /           | 1.04        | 1.04        | 1.01        | 1.01        |
| <b>Outputs</b>                                                                                                       |             |             |             |             |             |             |             |             |
| <b>Emissions – natural aggregate processing (kg)</b>                                                                 |             |             |             |             |             |             |             |             |
| The relevant emissions have been calculated based on the values provided in <b>Table 7 in Marinković et al. [44]</b> |             |             |             |             |             |             |             |             |
| <b>Avoided impacts</b>                                                                                               |             |             |             |             |             |             |             |             |
| Avoided pig iron production (kg)                                                                                     | /           | /           | /           | /           | 9.82        | 9.78        | 9.48        | 9.46        |
| Avoided disposal of EAF steel slag (kg)                                                                              | /           | /           | /           | /           | 1228        | 1223        | 1185        | 1183        |

**References**

44. Marinković, S.; Radonjanin, V.; Malešev, M.; Ignjatović, I. Comparative environmental assessment of natural and recycled aggregate concrete. *Waste Manag.* **2010**, *30*, 2255–2264, <https://doi.org/10.1016/j.wasman.2010.04.012>.
